# Supplementary material for: An Updated Meta-Analysis of Endothelial Nitric Oxide Synthase Gene: Three Well-Characterized Polymorphisms with Hypertension
Source: PLoS One. 2011 Sep 2;6(9):e24266. doi: 10.1371/journal.pone.0024266 (PMC3166328; doi:10.1371/journal.pone.0024266)
Supplement: Table S1 — The baseline characteristics of all qualified studies in this meta-analysis. (XLS) [file pone.0024266.s008.xls]

## Sheet: Table 1
Table S1. The baseline characteristics of all qualified studies in this meta-analysis
First Author	Year	Endpoint (BP cirteria)	Country (Ethnicity)	Study Design	Polymorphisms	Cases								Controls
						Age, year	Gender (M, %)	BMI, kg/m2	TG, mmol/L	TC, mmol/L	HDLC, mmol/L	LDLC, mmol/L		Age, year	Gender (M, %)	BMI, kg/m2	TG, mmol/L	TC, mmol/L	HDLC, mmol/L	LDLC, mmol/L
WIE studies
Miyamoto et al.	1998	Hypertens (140/90)	Japan (Asian)	HB	G894T, 4a/b	56.3 (11.6)	0.5138	23.8 (5.0)	NA	5.19 (0.97)	1.30 (0.44)	NA		54.2 (13.2)	0.5625	23.1 (2.7)	NA	5.13 (0.92)	1.26 (0.46)	NA
Lacolley et al.	1998	Hypertens (140/90)	France (White)	HB	G894T	NA	NA	NA	NA	NA	NA	NA		NA	NA	NA	NA	NA	NA	NA
Uwabo et al.	1998	Hypertens (160/95, 140/85)	Japan (Asian)	PB	4a/b	51.4 (7.2)	0.6098	24.26 (3.85)	NA	5.38 (1.15)	NA	NA		53.5 (10.1)	0.7417	22.96 (2.89)	NA	5.04 (1.12)	NA	NA
Kato et al.	1999	Hypertens (160/95, 140/90)	Japan (Asian)	HB	G894T	63.1 (9.8)	0.5556	23.7 (2.8)	1.61 (0.98)	5.52 (0.94)	1.56 (0.40)	NA		54.8 (11.3)	0.6043	22.4 (2.8)	1.31 (1.18)	5.26 (0.91)	1.65 (0.45)	NA
Benjafield et al.	2000	Hypertens (140/90)	Australia (White)	HB	G894T, 4a/b	NA	NA	NA	NA	NA	NA	NA		NA	NA	NA	NA	NA	NA	NA
Shoji et al.	2000	Hypertens (160/95, 140/90)	Japan (Asian)	HB	4a/b	56.9 (9.6)	0.4536	25.4 (3.5)	NA	5.38 (0.96)	1.53 (0.43)	NA		54.4 (11.9)	0.3472	23.2 (3.0)	NA	5.15 (0.91)	1.58 (0.38)	NA
Kajiyama et al.	2000	Hypertens (140/90)	Japan/Kyoto (Asian)	HB	T-786C	56.5 (11.5)	0.507	23.9 (5.1)	NA	5.22 (0.98)	1.30 (0.45)	NA		54.0 (13.2)	0.575107	23.0 (2.6)	NA	5.14 (0.97)	1.26 (0.46)	NA
Kajiyama et al.	2000	Hypertens (140/90)	Japan/Kumamoto (Asian)	HB	T-786C	NA	NA	NA	NA	NA	NA	NA		NA	NA	NA	NA	NA	NA	NA
Chen et al.	2001	Hypertens (140/90)	USA (White)	PB	G894T	29.3 (5.0)	NA	26.4 (5.8)	NA	NA	NA	NA		29.3 (5.0)	NA	26.4 (5.8)	NA	NA	NA	NA
Chen et al.	2001	Hypertens (140/90)	USA (Black-African Americans)	PB	G894T	28.6 (5.2)	NA	29.4 (8.0)	NA	NA	NA	NA		28.6 (5.2)	NA	29.4 (8.0)	NA	NA	NA	NA
Jachymova et al.	2001	Hypertens (140/90)	Czech Republic (White)	HB	G894T	59.8 (15.6)	NA	26.75 (3.55)	NA	NA	NA	NA		55.6 (14.3)	NA	26.5 (3.3)	NA	NA	NA	NA
Tsujita et al.	2001	Hypertens (140/90)	Japan (Asian)	PB	G894T, T-786C	60.1 (12.3)	0.473	26.4 (5.8)	NA	NA	NA	NA		60.1 (12.3)	0.473	22.7 (2.9)	NA	NA	NA	NA
Ukkola et al.	2001	Hypertens (160/95)	Finland (White)	HB	G894T	NA	NA	NA	NA	NA	NA	NA		NA	NA	NA	NA	NA	NA	NA
Karvonen et al.	2002	Hypertens (-)	Finland (White)	PB	G894T	NA	NA	NA	NA	NA	NA	NA		NA	NA	NA	NA	NA	NA	NA
Hyndman et al.	2002	Hypertens (140/95, 140/90)	Canada (White)	HB	T-786C	53 (11.4)	NA	NA	2.3 (1.7)	NA	1.2 (0.3)	3.3 (1.1)		44 (8.3)	NA	NA	1.5 (1.0)	NA	1.2 (0.3)	3.2 (0.8)
Grandone et al.	2003	Hypertens (140/90)	Italy (White)	HB	4a/b	35.5 (8.9)	0	NA	NA	NA	NA	NA		33.6 (7.87)	0	NA	NA	NA	NA	NA
Rodríguez-Pérez et al.	2003	Hypertens (140/90)	Spain (White)	HB	4a/b	59 (9)	0.719	28.22 (3.49)	NA	5.53 (1.16)	1.08 (0.33)	3.73 (0.95)		57 (8)	0.758	26.61 (3.55)	NA	5.53 (1.18)	1.10 (0.33)	3.72 (0.96)
Rossi et al.	2003	Hypertens (140/90)	Italy (White)	PB	T-786C	49 (9)	0.839416	26.4 (2.7)	1.66 (0.68)	5.57 (0.74)	1.19 (0.23)	3.58 (0.77)		43 (16)	0.62	23.8 (3.2)	1.26 (0.66)	4.98 (0.85)	1.37 (0.35)	3.05 (0.76)
El-Kilany et al.	2004	Hypertens (140/90)	Egypt (Arabs)	HB	G894T	NA	NA	NA	NA	NA	NA	NA		NA	NA	NA	NA	NA	NA	NA
Kishimoto et al.	2004	Hypertens (140/90)	Japan (Asian)	PB	G894T	43.0 (10.8)	0.565	23.0 (3.2)	NA	NA	NA	NA		43.0 (10.8)	0.565	23.0 (3.2)	NA	NA	NA	NA
Heltianu et al.	2005	Hypertens (160/95, 140/90)	Italy and France (White)	HB	G894T, 4a/b	54.3 (12.3)	0.6055	NA	2.31 (0.26)	5.51 (0.61)	1.52 (0.21)	NA		38.0 (1.5)	0.5882	NA	1.29 (0.10)	2.95 (0.24)	1.07 (0.51)	NA
Wolff et al.	2005	Hypertens (140/90)	German (White)	PB	G894T	57.4 (14.3)	0.598	28.9 (4.6)	NA	5.99 (1.23)	1.41 (0.44)	3.75 (1.16)		42.4 (14.9)	0.381	25.4 (4.2)	NA	5.53 (1.20)	1.51 (0.43)	3.36 (1.13)
Czarnecka et al.	2005	Hypertens (140/90)	Europe (White)	PB	G894T, 4a/b	44.2 (4.7)	0.4946	27.3 (3.9)	NA	NA	NA	NA		31.5 (4.7)	0.4428	24.5 (3.9)	NA	NA	NA	NA
Djuric et al.	2005	Hypertens (140/90)	Serbian (White)	HB	G894T	49.17 (12.14)	0.6686	26.86 (3.4)	1.89 (1.59)	6.04 (1.35)	2.07 (0.4)	3.76 (1.19)		45.27 (11.35)	0.585	25.28 (3.06)	1.47 (0.90)	5.79 (1.33)	1.4 (0.38)	3.74 (1.17)
Gouni-Berthold et al.	2005	Hypertens (140/90)	German (White)	HB	4a/b	64.6 (9.9)	0.57	29.3 (5.2)	3.68 (5.44)	6.36 (1.99)	1.23 (0.43)	3.78 (1.16)		60.3 (11.8)	0.565	27.6 (4.7)	4.03 (16.60)	6.65 (2.43)	1.3 (0.4)	3.81 (1.21)
Demirel et al.	2005	Hypertens (140/90)	Europe (White)	HB	4a/b	45.0 (6.4)	0.4109	NA	NA	NA	NA	NA		35.6 (6.8)	0.5426	NA	NA	NA	NA	NA
Sandrim et al.	2006	Hypertens (140/90)	Brazil (White)	HB	G894T, 4a/b, T-786C	46 (12)	0.399	28 (5)	NA	5.02 (0.98)	NA	NA		41 (8)	0.67	27 (3)	NA	4.76 (0.96)	NA	NA
Sandrim et al.	2006	Hypertens (140/90)	Brazil (Black)	HB	G894T, 4a/b, T-786C	46 (12)	0.399	28 (5)	NA	5.02 (0.98)	NA	NA		41 (8)	0.67	27 (3)	NA	4.76 (0.96)	NA	NA
Zhao et al.	2006	Hypertens (160/100, 140/90)	China (Asian)	PB	G894T, 4a/b, T-786C	53.57 (9.34)	0.5209	26.32 (3.85)	1.70 (1.06)	5.23 (0.99)	1.25 (0.30)	3.19 (0.86)		53.51 (9.23)	0.5413	24.30 (3.56)	1.43 (0.86)	5.06 (1.05)	1.32 (0.34)	3.09 (0.87)
Moe et al.	2006	Hypertens (140/90)	Singapore (Asian)	HB	G894T, 4a/b, T-786C	56.1 (9.34)	0.6602	25.7 (4.06)	1.85 (1.83)	4.92 (1.22)	1.45 (0.51)	2.81 (1.01)		54 (8.97)	0.7115	24.4 (4.28)	1.65 (1.53)	5.04 (1.02)	1.43 (0.51)	2.98 (0.92)
Olcay et al.	2006	Hypertens (-)	Turkey (Turkish)	HB	4a/b	59.4 (10.14)	0.391	NA	NA	NA	NA	NA		40.53 (15.83)	0.478	NA	NA	NA	NA	NA
Deng et al.	2007	Hypertens (140/90)	China (Kazakh-Asian)	PB	4a/b	47.06 (10.65)	0.3907	28.35 (5.02)	1.28 (0.86)	5.19 (1.11)	1.29 (0.28)	3.16 (0.91)		46.57 (10.03)	0.3913	24.71 (5.32)	1.12 (0.72)	4.90 (1.27)	1.37 (0.36)	2.95 (0.95)
Tang et al. (Hani)	2008	Hypertens (140/90, 120/80)	China (Hani-Asian)	PB	G894T	52.2 (10.5)	0.593	22.8 (2.8)	NA	NA	NA	NA		50.6 (9.7)	0.5038	21.5 (2.6)	NA	NA	NA	NA
Tang et al. (Yi)	2008	Hypertens (140/90, 120/80)	China (Yi-Asian)	PB	G894T	47.1 (10.4)	0.4646	22.7 (3.0)	NA	NA	NA	NA		45.7 (7.5)	0.5075	21.3 (2.7)	NA	NA	NA	NA
Periaswamy et al.	2008	Hypertens (140/90, 130/85)	India (Asian)	HB	G894T	47.44 (0.38)	0.4863	NA	NA	4.53(1.4)	NA	2.83 (1.2)		44.90 (0.38)	0.4527	NA	NA	4.36 (1.5)	NA	2.71 (0.33)
Ghazali et al.	2008	Hypertens (140/90)	Malaysia (Asian)	HB	G894T	54.8 (6.3)	0.475	27.2 (4.3)	1.76 (0.93)	5.84 (1.16)	NA	NA		54.3 (6.4)	0.4697	25.1 (4.0)	1.79 (1.20)	5..91 (1.13)	NA	NA
Srivastava et al.	2008	Hypertens (140/90)	India (Asian)	HB	G894T	46.78 (5.6)	0.743	NA	NA	NA	NA	NA		44.98 (8.4)	0.805	NA	NA	NA	NA	NA
Kobashi et al.	2009	HIP (160/110, 140/90)	Japan (Asian)	HB	G894T	28.8 (5.0)	0	22.4 (4.2)	NA	NA	NA	NA		0.0567376	28.9 (4.9)	0	NA	NA	NA	NA
Niu et al.	2009	Hypertens (140/90)	China (Han-Asian)	PB	G894T, 4a/b, T-786C	50.62 (6.58)	0.584	26.32 (3.71)	1.24 (0.89)	4.01 (1.32)	1.09 (0.37)	2.20 (1.06)		52.99 (7.50)	0.4222	24.38 (3.00)	1.19 (0.83)	3.94 (1.39)	1.36 (0.56)	2.15 (0.91)
Jemaa et al.	2009	Hypertens (140/90)	Tunis (Arab)	HB	4a/b	55.5 (10.1)	NA	31.1 (7.3)	NA	NA	NA	NA		48.9 (9.1)	NA	25.5 (4.4)	NA	NA	NA	NA
Patkar et al.	2009	Hypertens (140/90)	India (Asian)	HB	4a/b	52.73 (11.52)	0.5	NA	NA	NA	NA	NA		NA	0.6009	NA	NA	NA	NA	NA
Vasconcellos et al.	2010	Hypertens (140/90)	Brazil (White and Black)	HB	G894T, 4a/b, T-786C	54.5 (10.7)	0.3988	31.0 (5.9)	1.77 (1.24)	4.89 (1.14)	1.28 (0.4)	2.78 (0.90)		52.3 (8.6)	0.505	27.1 (6.0)	1.81 (0.72)	4.71 (0.88)	1.1 (0.18)	2.44 (0.75)
Kingah et al.	2010	Hypertens (140/90)	US (White)	PB	G894T	54.5 (5.11)	NA	27.0 (5.1)	NA	5.56 (1.06)	NA	NA		54.5 (5.11)	NA	27.0 (5.1)	NA	5.56 (1.06)	NA	NA
Kingah et al.	2010	Hypertens (140/90)	USA (ARIC African American)	PB	G894T	53.6 (0.09)	NA	29.6 (6.1)	NA	5.56 (1.13)	NA	NA		53.6 (0.09)	NA	29.6 (6.1)	NA	5.56 (1.13)	NA	NA
Kitsios et al.	2010	Hypertens (140/90)	Greek (White)	HB	G894T, 4a/b	63.9 (9.4)	0.544	28.7 (4.1)	1.50 (0.73)	4.94 (1.25)	1.17 (0.45)	2.92 (1.02)		40.8 (18.3)	0.222	27.5 (4.4)	NA	NA	NA	NA
Sediri et al.	2010	Hypertens (140/90)	Tunis (Arab)	HB	G894T	55.5 (10.1)	0.411	NA	NA	NA	NA	NA		48.7 (8.9)	0.5914	NA	NA	NA	NA	NA
WIC studeis [References corresponding to 'Chinese References' as Supplementary Materials]
Di Q et al. [1]	2002	Hypertens (160/95)	Jiangsu/Nanjing (Han)	HB	G894T	70.50 (9.20)	0.884211	24.0 (2.5)	1.56 (0.84)	4.37 (0.92)	1.25 (0.27)	2.52 (0.61)		69.50 (9.80)	0.894737	23.4 (3.2)	1.49 (0.96)	4.29 (1.07)	1.29 (0.24)	2.63 (2.16)
Liu HZ et al. [2]	2002	Hypertens (140/90)	Hubei/Wuhan (Han)	HB	G894T	65.14 (11.61)	0.592233	NA	NA	NA	NA	NA		61.88 (14.81)	0.621622	NA	NA	NA	NA	NA
Lu P et al. [3]	2002	Hypertens (160/95)	Beijing (Han)	HB	4a/b	58 （22-93）	0.743671	NA	NA	NA	NA	NA		61 （36-86）	0.583942	NA	NA	NA	NA	NA
Jia CQ et al. [4]	2003	Hypertens (140/90)	Shandong (Han)	PB	G894T	47.905 (6.150)	0.810345	26.09 (2.843)	1.64 (0.62)	5.63 (1.07)	1.21 (0.32)	NA		46.49 (7.37)	0.786765	23.95 (2.72)	1.39 (0.56)	4.77 (1.00)	1.35 (0.31)	NA
Li DB et al. [5]	2003	Hypertens (140/90)	Beijing (Han)	HB	4a/b	45.6 (12.8)	0.535928	NA	NA	NA	NA	NA		53.0 (9.1)	0.558824	NA	NA		NA	NA
Tan JC et al. [6]	2004	Hypertens (140/90)	Chongqing (Han)	HB	G894T	59 (7)	0.539823	24.3 (3.6)	1.5 (0.8)	5.1 (1.0)	NA	NA		NA	NA	23.5 (3.1)	1.4 (1.2)	4.9 (1.0)	NA	NA
Xu XJ et al. [7]	2004	Hypertens (160/95)	Xinjiang/Barkol (Kazakh)	PB	G894T	48.6 (11.0)	0.458128	25.1 (3.60)	1.07 (0.60)	4.80 (1.56)	NA	NA		47.9 (10.3)	0.410526	24.3 (2.97)	1.01 (0.58)	4.67 (1.48)	NA	NA
Cai X et al. [8]	2005	HIP (-)	Xinjiang/Urumqi (Han)	HB	G894T	29.0 (4.5)	0	NA	NA	NA	NA	NA		28.4 (3.7)	0	NA	NA	NA	NA	NA
Cai X et al. [8]	2005	HIP (-)	Xinjiang/Urumqi (Uygur)	HB	4a/b	29 (4)	0	NA	NA	NA	NA	NA		29 (5)	0	NA	NA	NA	NA	NA
Cai X et al. [9]	2005	HIP (-)	Xinjiang/Urumqi (Han)	HB	4a/b	29 (5)	0	NA	NA	NA	NA	NA		28 (4)	0	NA	NA	NA	NA	NA
Ma HX et al. [10]	2005	Hypertens (140/90)	Chongqing (Han)	PB	G894T, T-786C	62.0 (3.5)	0.505208	NA	NA	NA	NA	NA		62.0 (3.5)	0.622951	NA	NA	NA	NA	NA
Xu XJ et al. [11]	2005	Hypertens (140/90)	Xinjiang/Urumqi (Kazakh)	HB	4a/b	48 (11)	0.461538	25.02 (3.53)	1.08 (0.61)	4.84 (1.56)	NA	NA		48 (10)	0.406593	24.32 (2.97)	1.00 (0.58)	4.67 (1.46)	NA	NA
Zhao F et al. [12]	2005	Hypertens (140/90)	Guangdong/Guangzhou (Han)	HB	G894T	58 (11)	0.386667	NA	NA	NA	NA	NA		30 (6)	0.385714				NA	NA
Zhao XY et al. [13]	2005	Hypertens (140/90)	Hebei/Shijiazhuang (Han)	HB	4a/b	62.26 (7.36)	0.512077	25.09 (2.42)	1.62 (0.76)	4.91 (0.99)	NA	NA		61.01 (8.67)	0.506494	23.41 (2.18)	1.36 (0.61)	3.07 (0.88)	NA	NA
Zhao Y et al. [14]	2005	HIP (-)	Hubei/Wuhan (Han)	HB	4a/b	29 (5)	0	NA	NA	NA	NA	NA		28 (4)	0	NA	NA	NA	NA	NA
Dang HS et al. [15]	2006	Hypertens (140/90)	Hubei/Shiyan (Han)	HB	G894T, 4a/b, T-786C	56.4 (10.1)	0.648936	NA	1.4 (0.8)	4.8(1.2)	1.3 (0.3)	3.2 (1.0)		52.1 (10.4)	0.762887	NA	NA	NA	NA	NA
Dong HY et al. [16]	2006	Hypertens (140/90)	Guangdong/Shenzhen (Han)	HB	G894T	56.8 (8.5)	0.556701	NA	NA	NA	NA	NA		57.2 (9.5)	0.551724	NA	NA	NA	NA	NA
Li DB et al. [17]	2006	Hypertens (140/90)	Beijing (Han)	HB	G894T, T-786C	47.99 (9.90)	0.516129	NA	NA	NA	NA	NA		47.14 (12.30)	0.509934	NA	NA	NA	NA	NA
Liang Q et al. [18]	2006	Hypertens (140/90)	Guangdong/Fushan (Han)	HB	G894T	62 (8)	0.709677	NA	NA	NA	NA	NA		63 (9)	0.74	NA	NA	NA	NA	NA
Wang C et al. [19]	2006	Hypertens (140/90)	Inner Mongolia/Ordos (Mongol)	PB	T-789C	56.64 (9.69)	0.6	NA	1.52 (0.56)	4.71 (1.03)	1.38 (0.48)	2.36 (1.0)		52.72 (14.31)	0.55	NA	1.74 (0.68)	4.79 (1.09)	1.27 (0.37)	3.11 (3.94)
Wang L et al. [20]	2006	Hypertens (140/90)	Liaoning/Dalian (Han)	HB	G894T	59.05 (13.04)	0.522059	26.03 (3.45)	1.81 (1.19)	5.00 (0.99)	1.17 (0.26)	3.11 (0.96)		43.01 (11.43)	0.634429	23.80 (2.91)	1.52 (1.25)	4.58 (1.17)	1.15(0.30)	2.88 (1.02)
Zhang LP et al. [21]	2006	Hypertens (140/90)	Xijiang/Turpan (Uygur)	PB	G894T	54.49 (10.30)	0.333333	27.92 (4.60)	1.90 (1.35)	4.68 (1.21)	NA	NA		51.25 (10.22)	0.391304	25.73 (4.17)	1.63 (1.21)	4.37 (1.00)	NA	NA
Zhao Y et al. [22]	2006	HIP (-)	Hubei/Wuhan (Han)	HB	G894T	29 (5)	0	NA	NA	NA	NA	NA		28 (4)	0	NA	NA	NA	NA	NA
Huang HB et al. [23]	2007	Hypertens (140/90)	Fujian (Han)	HB	4a/b	60.6 (6.8)	0.61674	25.67 (2.84)	1.85 (1.34)	5.02 (1.16)	NA	3.59 (1.05)		57.1 (8.2)	0.606897	23.84 (2.61)	1.57 (1.23)	4.77 (1.14)	NA	3.26 (0.66)
Wang C et al. [24]	2007	Hypertens (140/90)	Inner Mongolia/Ordos (Mongol)	PB	G894T	56.64 (9.69)	0.6	NA	1.52 (0.56)	4.71 (1.03)	1.38 (0.48)	2.36 (1.0)		52.72 (14.31)	0.55	NA	1.74 (0.68)	4.79 (1.09)	1.27 (0.37)	3.11 (3.94)
Yuan H et al. [25]	2007	Hypertens (140/90)	Beijing, Jilin, Tangshan, Shandong (Han)	HB	4a/b	36.10 (5.86)	0.53913	24.18 (1.38)	1.42 (0.37)	5.08 (0.80)	NA	NA		36.06 (6.26)	0.565836	23.58 (1.91)	1.09 (0.43)	5.04 (0.76)	NA	NA
Ding YS et al. [26]	2008	HIP (-)	Shandong/Weifang (Han)	HB	G894T	NA	0	NA	NA	NA	NA	NA		NA	0	NA	NA	NA	NA	NA
Zhao SG et al. [27]	2008	Hypertens (140/90)	Inner Mongolia/Urad Back Banner (Mongol)	PB	G894T	63 (10)	0.509615	25.1 (2.6)	1.2 (0.4)	5.1 (1.1)	1.4 (0.5)	NA		59 (11)	0.482143	24.9 (2.3)	1.3 (0.5)	5.2 (1.0)	1.4 (0.4)	NA
Liu HZ [28]	2009	Hypertens (140/90)	Hubei/Wuhan (Han)	HB	G894T	NA	NA	NA	NA	NA	NA	NA		NA	NA	NA	NA	NA	NA	NA
Wang ZQ et al. [29]	2009	Hypertens (140/90)	Shandong/Qingdao (Han)	HB	G894T	68.61 (12.61)	0.569565	23.69 (3.40)	1.28 (0.86)	4.93 (1.01)	NA	NA		68.51 (13.36)	0.612903	22.78 (3.51)	1.09 (1.05)	3.78 (1.20)	NA	NA
Zhang HF et al. [30]	2009	Hypertens (140/90)	Gansu (Han)	PB	G894T	54.46 (9.91)	0.449857	NA	NA	NA	NA	NA		54.13 (8.54)	0.429907	NA	NA	NA	NA	NA
Wang G et al. [31]	2010	Hypertens (140/90)	Xinjiang/Tacheng (Kazakh)	PB	4a/b	49.64 (12.05)	0.429752	27.38 (4.82)	1.63 (5.53)	5.01 (1.37)	1.44 (0.43)	3.23 (1.06)		38.46 (11.91)	0.413514	23.99 (4.11)	0.96 (1.01)	4.65 (1.30)	1.46 (0.41)	2.99 (1.18)
Wang XH et al. [32]	2010	Hypertens (140/90)	Yunnan (Han)	HB	G894T	59.9 (3.91)	0.655844	24.48 (2.44)	2.42 (1.81)	5.14 (1.35)	1.30 (0.90)	4.89 (2.76)		60.59 (3.81)	0.62	22.92 (2.86)	2.09 (1.58)	5.40 (0.90)	1.37 (0.35)	3.22 (0.76
Zhou JZ et al. [33]	2010	Hypertens (140/90)	Xinjiang (Han)	HB	G894T, 4a/b	69 (11)	0.681818	NA	NA	NA	NA	NA		66 (12)	0.580153	NA	NA	NA	NA	NA
Abbreviations: WIE studies, written-in-English studies; WIC studies, written-in-Chinese studies; BP, blood pressure; HIP, hypertension in pregnancy; HB, hospital-based; PB, population-based; Gender (M, %): Gender (Males, percent); BMI, body mass index; TG, triglycerides; TC, total cholesterol; HDLC, high-density lipoprotein cholesterol; LDLC, low-density lipoprotein cholesterol; NA, not available.
Chinese references: 1. Di Q, Zhan YY, Cheng YL, Ding XJ. Association of Glu298Asp polymorphism of the endothelia nitric oxide synthase gene with essential hypertension in old people. Chinese General Practice. 2002; 5(5):355-357. 2. Liu HZ, Ha DW. Relationship between 894G->T polymorphism of endothelial nitric oxide synthase gene and essential hypertension. Chinese Circulation Journal. 2002; 17(5)…
16. Dong HY, Liu QR, Wang Q, Luo ZG. Association between essential hypertension and the polymorphism of angiotensin-converting enzyme gene and endothelial nitric oxide synthase gene. Journal of Chinese Physician. 2006; 8(8):1059-1061. 17. Li DB, Hua Qi, Pi L. The relationship of T786C polymorphism of endothelial nitric oxide synthase gene to essential hypertension. 2006; 27(2):226-229. 18. Liang …
